# Supplementary material
Source: PubMed Central journal article supplement (PMC4424015)
Supplement: supp_pp.114.255547_255547revSupplementalFigS2.pdf [file supp_pp.114.255547_255547revSupplementalFigS2.pdf]

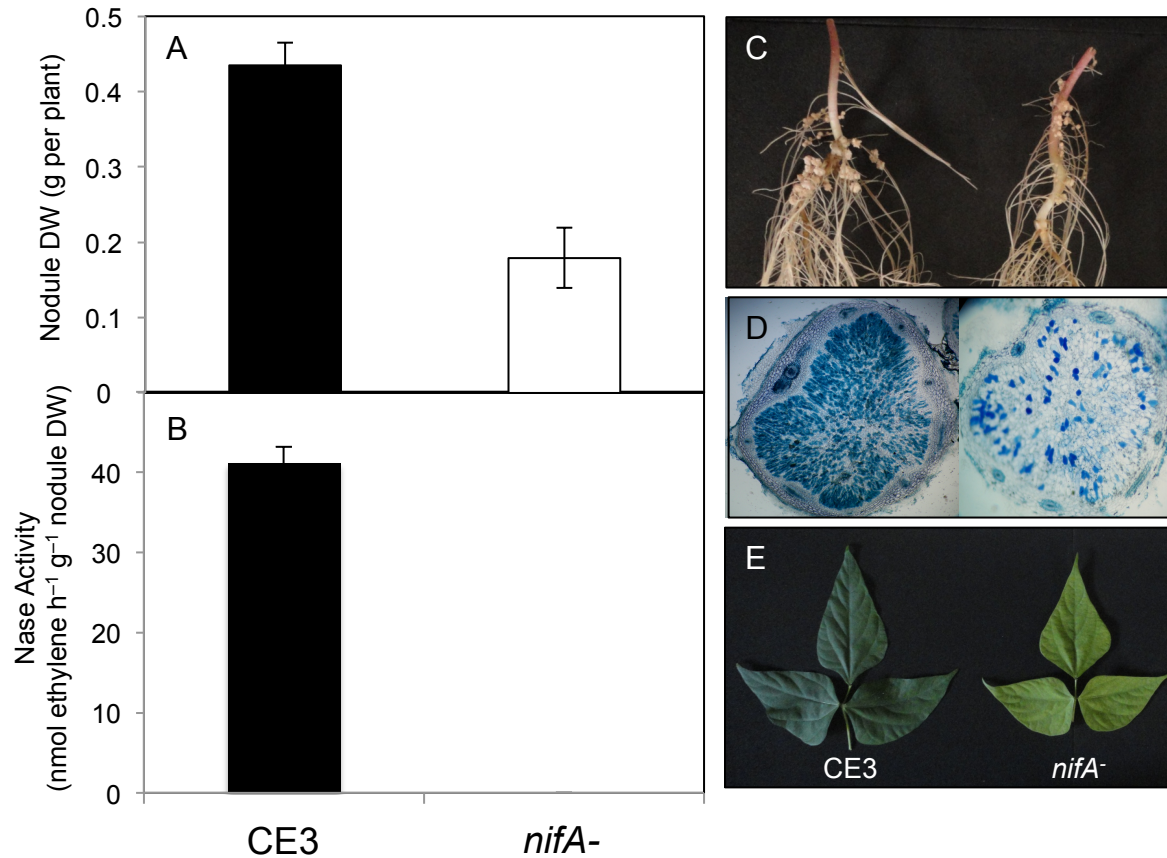

**Supplemental Figure S2.** Symbiotic phenotype of common bean plants inoculated with *Rhizobium etli nifA*<sup>-</sup> mutant strain as compared to CE3 wild type strain. Determinations were done at 18 dpi. A, Nodules per plant (DW), n=10 plants. B, Nitrogenase activity (acetylene reduction assay) n=10 plants. C, Nodulation-competent zone of roots. D, Light micrographs of methylene blue-stained transverse section of nodules. E, Trifoliated leaves (first, oldest, trifolium)
