# Supplementary material
Source: PubMed Central journal article supplement (PMC4424015)
Supplement: supp_pp.114.255547_255547Supplemental_Fig._S1.pdf [file supp_pp.114.255547_255547Supplemental_Fig._S1.pdf]

| This work                     | Pelaez et al., 2012 | Sequence                     | <i>P. vulgaris</i> genome mapping |
|-------------------------------|---------------------|------------------------------|-----------------------------------|
| <b>miR172a</b> ( miR172a/e/f) | ath-miR172a         | AGAAUCUUGAUGAUGCUGCA (20nt)  | Chr. 5 pos. 35,820,612-631        |
| <b>miR172b</b>                | zma-miR172a         | AGAAUCUUGAUGAUGCUGCAU (21nt) | Chr. 5 pos. 37,407,928-947        |
| <b>miR172c</b> ( miR172c/d)   | ptc-miR172g         | GGAAUCUUGAUGAUGCUGCAG (21nt) | Chr. 1 pos. 49,411,375-395        |
| miR172d                       | ptc-miR172g         | GGAAUCUUGAUGAUGCUGCAG (21nt) | Chr. 8 pos. 49,749,706-726        |
| miR172e                       | ath-miR172a         | AGAAUCUUGAUGAUGCUGCA (20nt)  | Chr. 11 pos. 7,868,006-025        |
| miR172f                       | ath-miR172a         | AGAAUCUUGAUGAUGCUGCA (20nt)  | Chr. 7 pos. 10,358,575-594        |

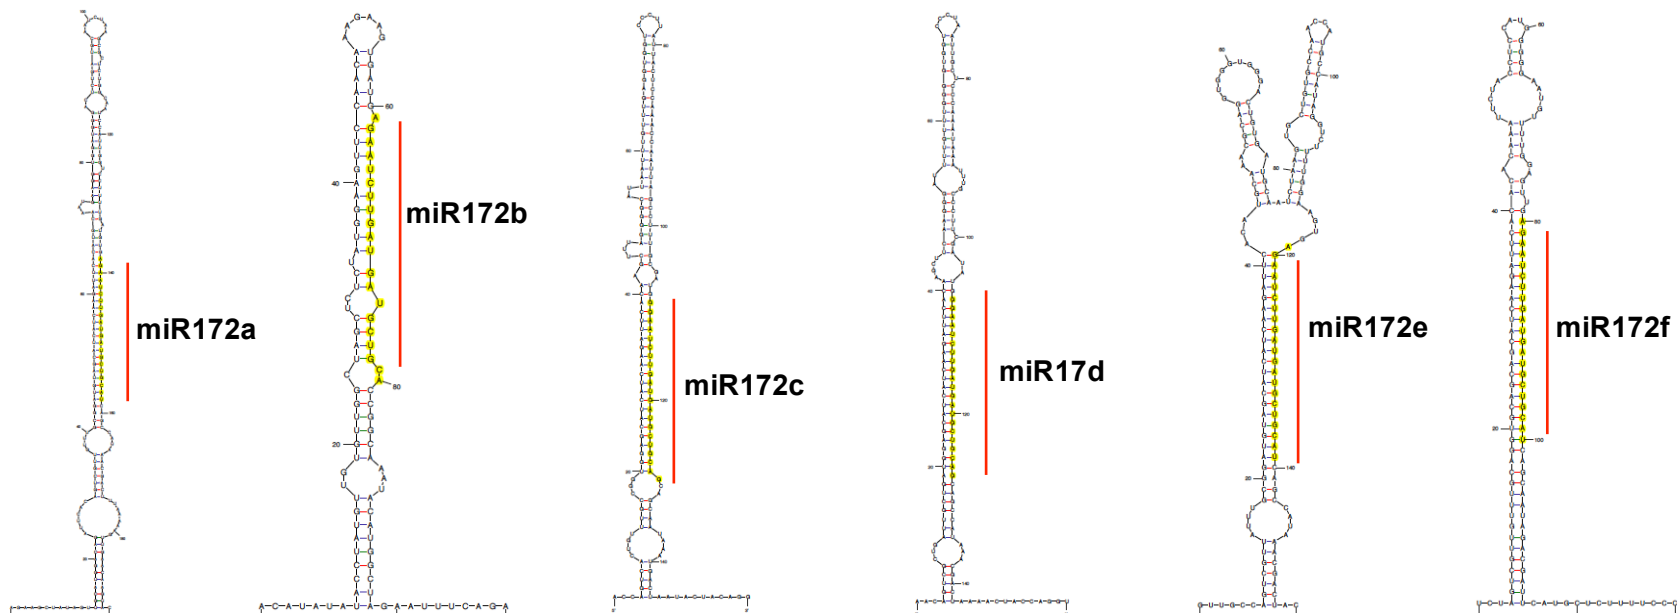

**Supplemental Figure S1. miR172 isoforms encoded in the *Phaseolus vulgaris* genome and the most stable secondary structures predicted for their precursors.** Data from analysis of the *P. vulgaris* genome sequence (Schmutz et al., 2014; [www.phytozome.net](http://www.phytozome.net) V.1.0). The previous designation of each miR172 isoform according to Peláez et al. 2012 is provided. The most stable secondary structure predicted for each pre-miR172 using Mfold is shown, mature miR172 sequence are highlighted with red lines and yellow boxes.
