# Supplementary material
Source: PubMed Central journal article supplement (PMC4424015)
Supplement: supp_pp.114.255547_255547Supplemental_Fig._S3.pdf [file supp_pp.114.255547_255547Supplemental_Fig._S3.pdf]

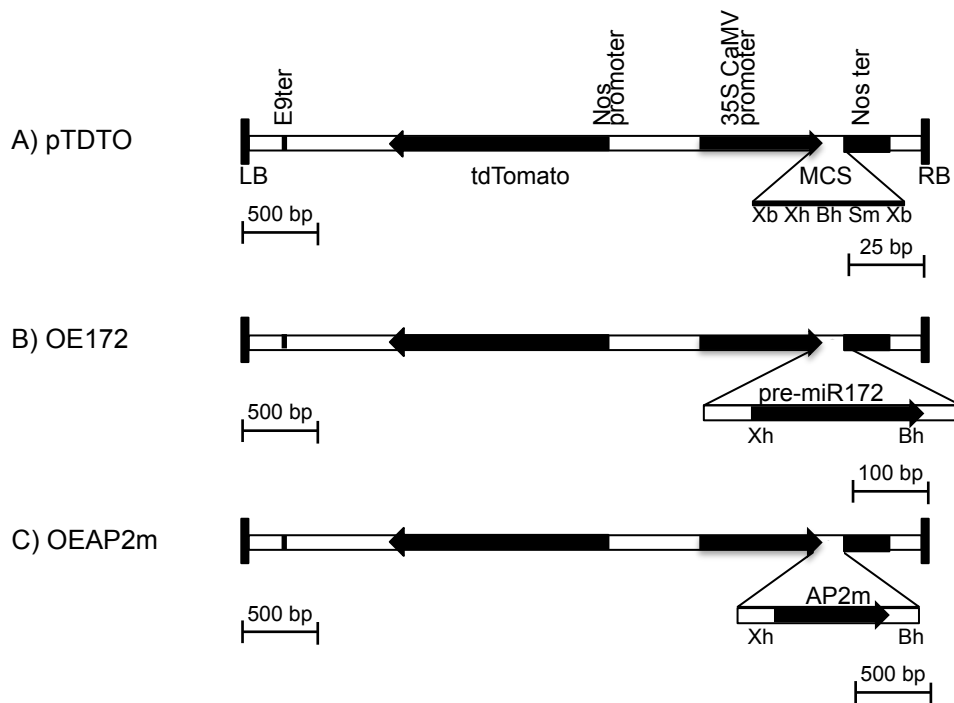

D) miR172 cleavage site

|                    |     |    |              |              |                |              |     |     |   |     |
|--------------------|-----|----|--------------|--------------|----------------|--------------|-----|-----|---|-----|
| D.1. Mutated AP2-1 | 593 | CT | <u>G</u> Cc* | G <u>C</u> c | <u>aga</u> *** | T <u>C</u> t | GGA | TTC | T | 613 |
|                    | 199 |    | Ala          | Ala          | Arg            | Ser          | Gly | Phe |   | 204 |
| D.2. WT AP2-1      | 593 | CT | <u>G</u> CA  | G <u>C</u> A | <u>TCA</u>     | TCA          | GGA | TTC | T | 613 |
|                    | 199 |    | Ala          | Ala          | Ser            | Ser          | Gly | Phe |   | 204 |

**Supplemental Figure S3.** Schematic representation of plasmids used for miR172c or AP2-1 overexpression. (A) Plasmid vector pTDTO and its derivatives with (B) miR172c precursor (pre-miR172c) and (C) mutagenized *P. vulgaris* AP2-1 (AP2m) that is insensitive to miR172 cleavage. (D) miR172 cleavage site of AP2-1. Numbers correspond to nucleotides and aminoacids in the AP2-1 coding region. \* Indicates the nucleotides modified to generate a mutated miR172 cleavage site. *Bgl*II and *Pst*I restriction sites are underlined.
