# Supplementary material
Source: PubMed Central journal article supplement (PMC4424015)
Supplement: supp_pp.114.255547_255547Supplemental_Fig._S4.pdf [file supp_pp.114.255547_255547Supplemental_Fig._S4.pdf]

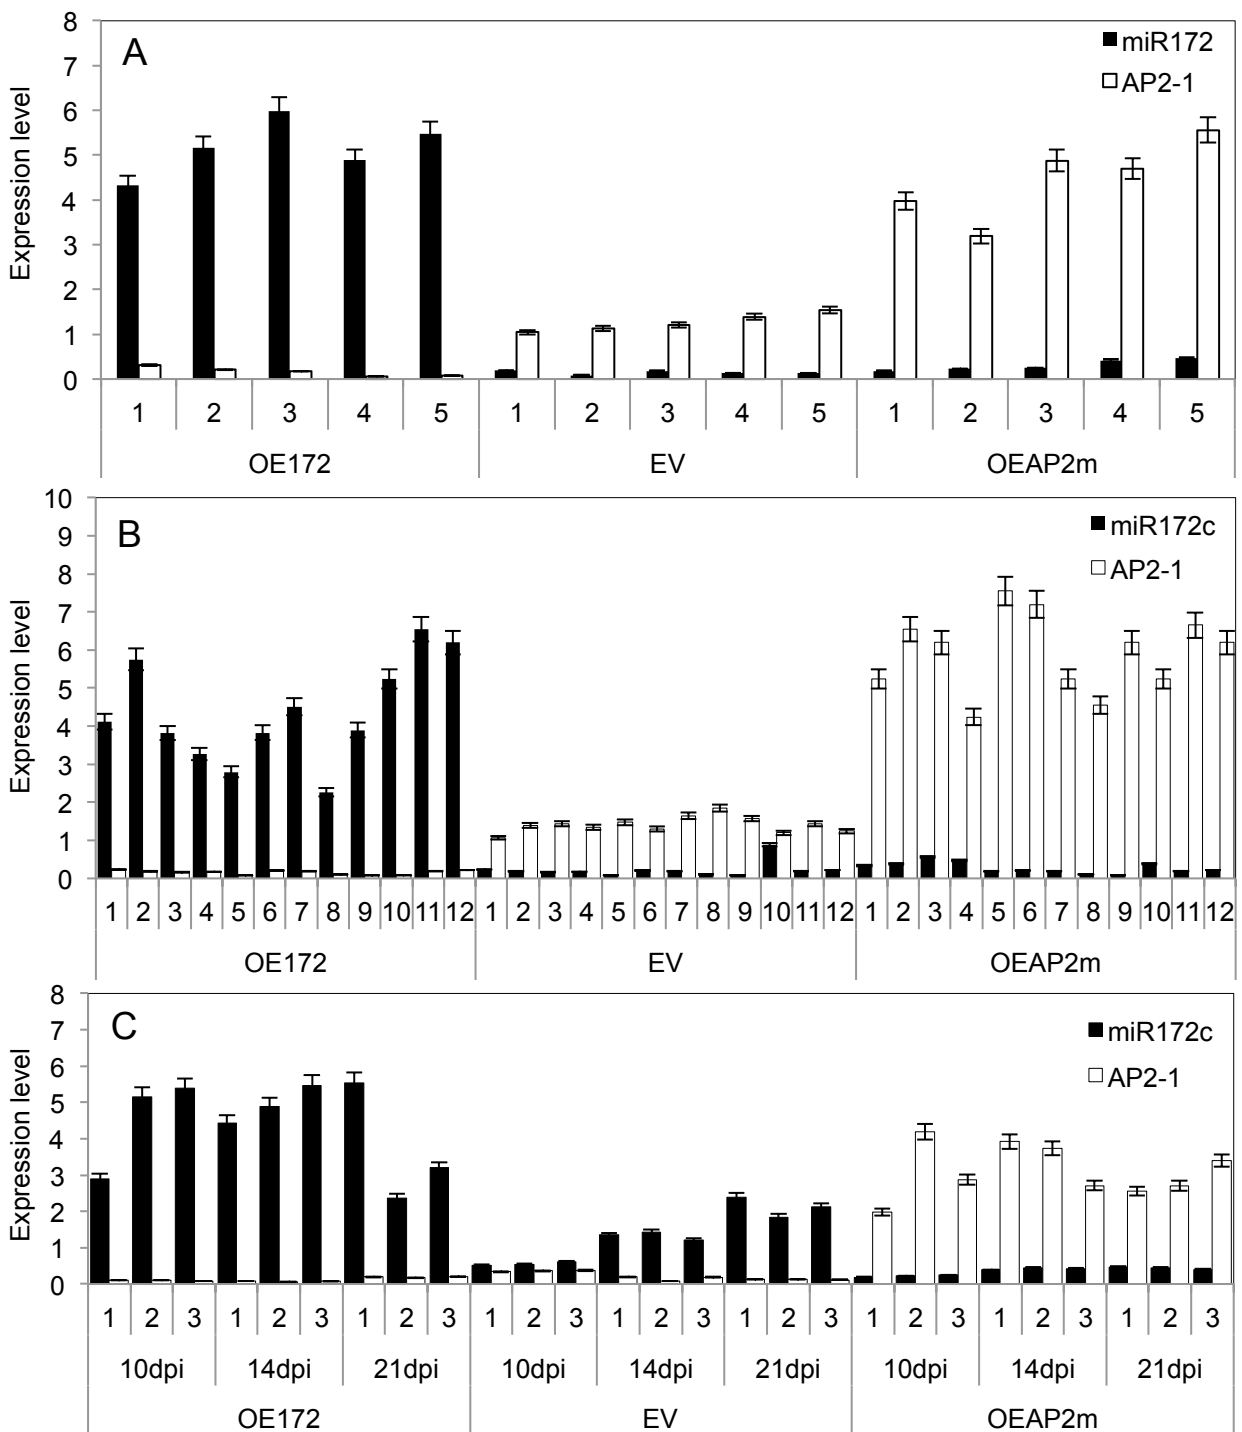

**Supplemental Figure S4. Over-expression of miR172c and of AP2m in transgenic roots and nodules of composite bean plants.** Expression analysis from transgenic roots (A,B) and nodules (C) of OE172, EV or OEAP2m composite plants was performed by qRT-PCR. Each bar (black = miR172c; white = AP2-1) represent the transcript levels from tissue of an individual composite plant. A, Roots from 5 plants with each construct watered with full-nutrient solution (+N). B, Nodule-detached roots from 12 *R. etli*-inoculated plants (21 dpi) with each construct C, Nodules detached from roots of 3 individual plants with each construct, at different dpi. The values represent the average ( $\pm$  SD) from two technical replicates each.
