# Supplementary material
Source: PubMed Central journal article supplement (PMC4424015)
Supplement: supp_pp.114.255547_255547Supplemental_Fig._S5.pdf [file supp_pp.114.255547_255547Supplemental_Fig._S5.pdf]

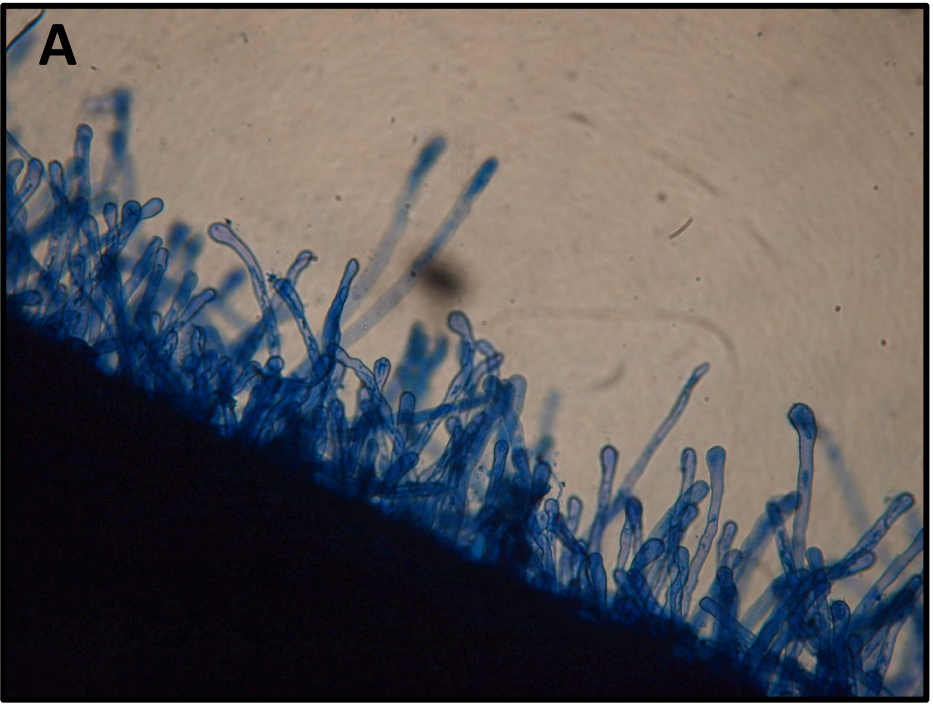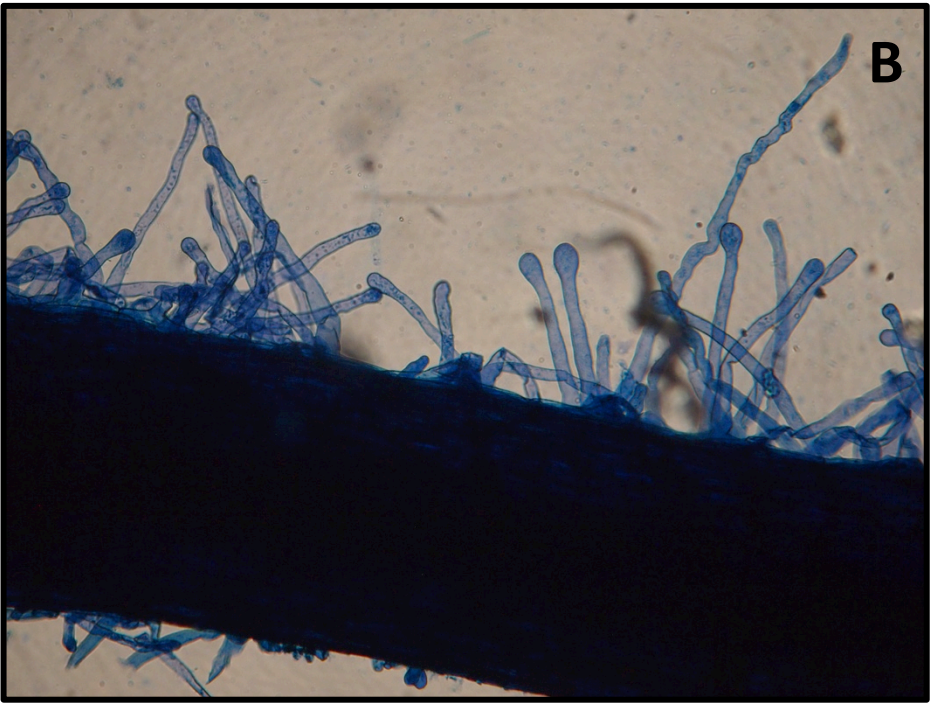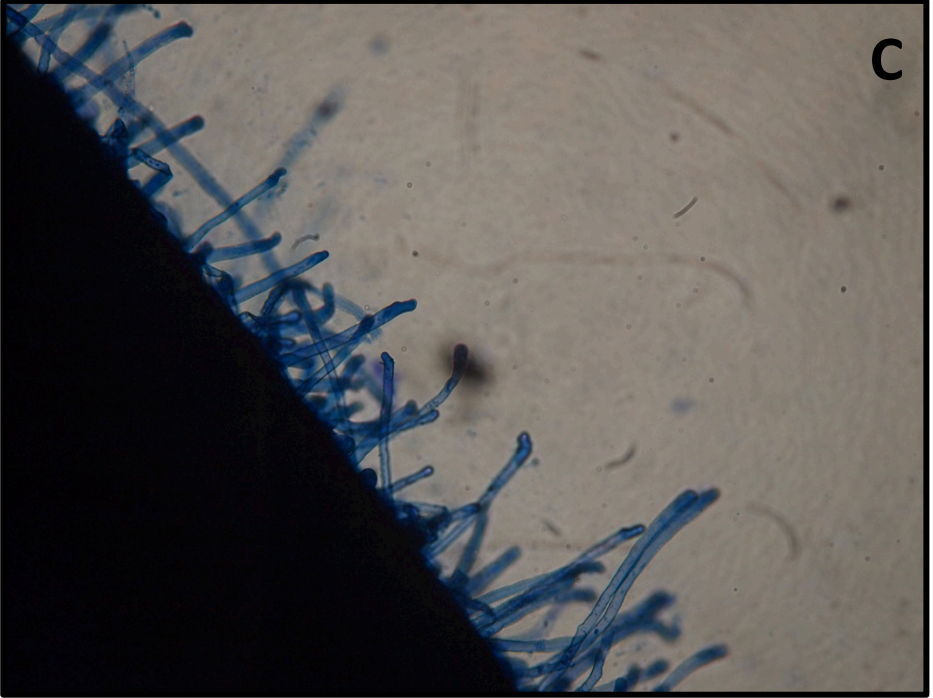

**Supplemental Figure S5.** miR172 and AP2 control the rhizobia infection in common bean roots. Transgenic roots expressing OE172 (A), Empty Vector (B) or OEAP2m (C) were inoculated with *R. etli* C3. After 48 h post-inoculation, number of deformed root hairs (branched- and swollen) from the root responsive zone were quantified.
