# Supplementary material
Source: PubMed Central journal article supplement (PMC4424015)
Supplement: supp_pp.114.255547_255547Supplemental_Fig._S6.pdf [file supp_pp.114.255547_255547Supplemental_Fig._S6.pdf]

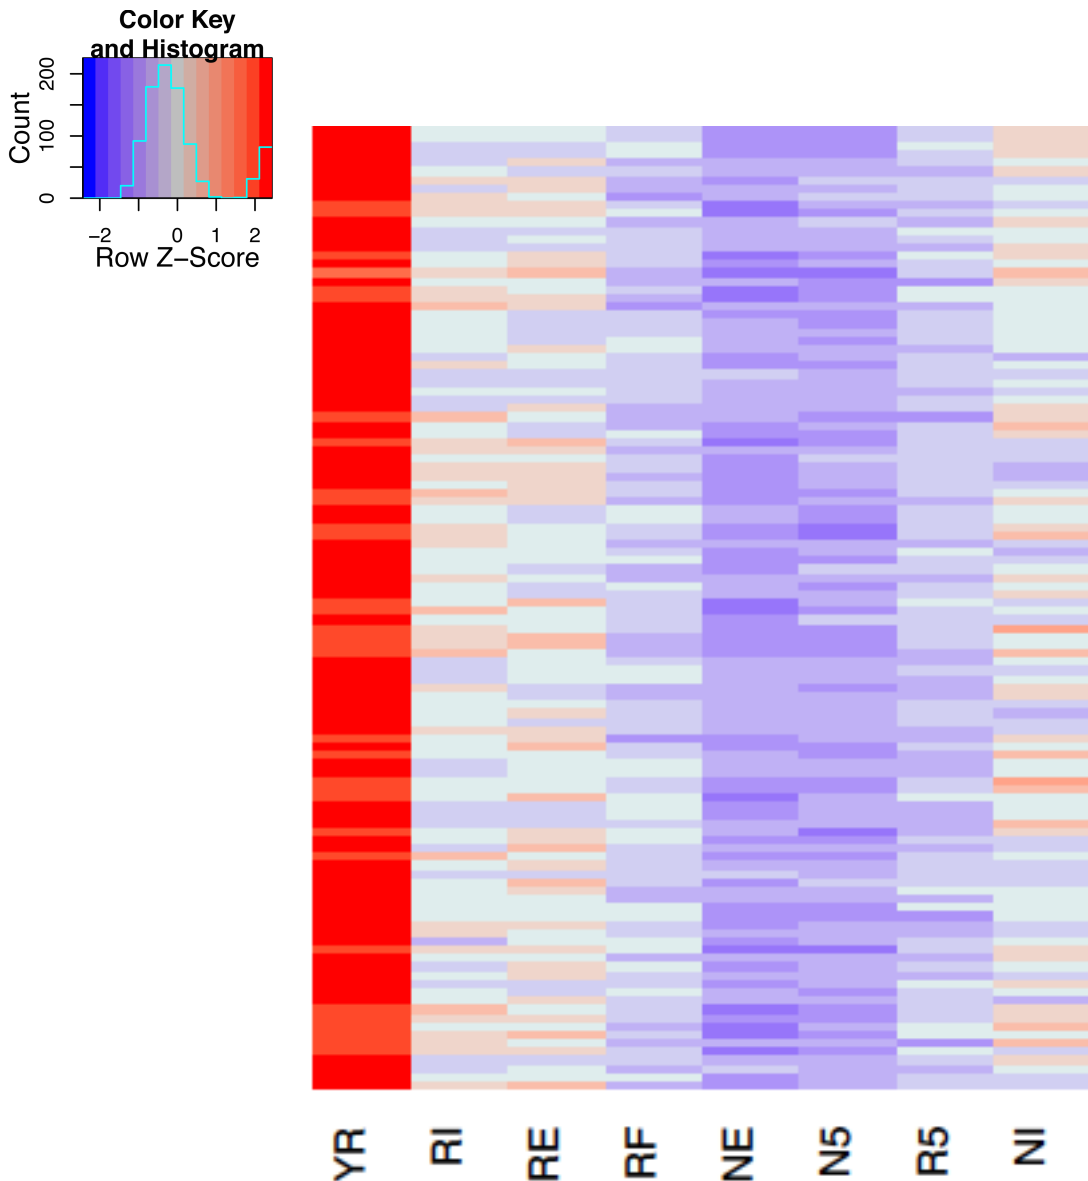

**Supplemental Figure S6. Expression pattern of *AP2-1* co-expressed genes.** Expression profile (as Z-scores: red = high, blue = low) of 144 root-enhanced genes listed in Supplemental Table S4. Tissue samples: YR=young roots, RI=ineffective nodule-detached roots (21 dpi), RE=effective nodules-detached roots (21 dpi), RF=roots from non-symbiotic plants grown in full-nutrient solution, NE=effective (21 dpi) nodules, N5=pre-fixing effective (5 dpi) nodules, R5=nodule-detached roots from 5dpi, NI=ineffective (21 dpi) nodules
