# Supplementary material
Source: PubMed Central journal article supplement (PMC4424015)
Supplement: supp_pp.114.255547_255547Supplemental_Fig._S7.pdf [file supp_pp.114.255547_255547Supplemental_Fig._S7.pdf]

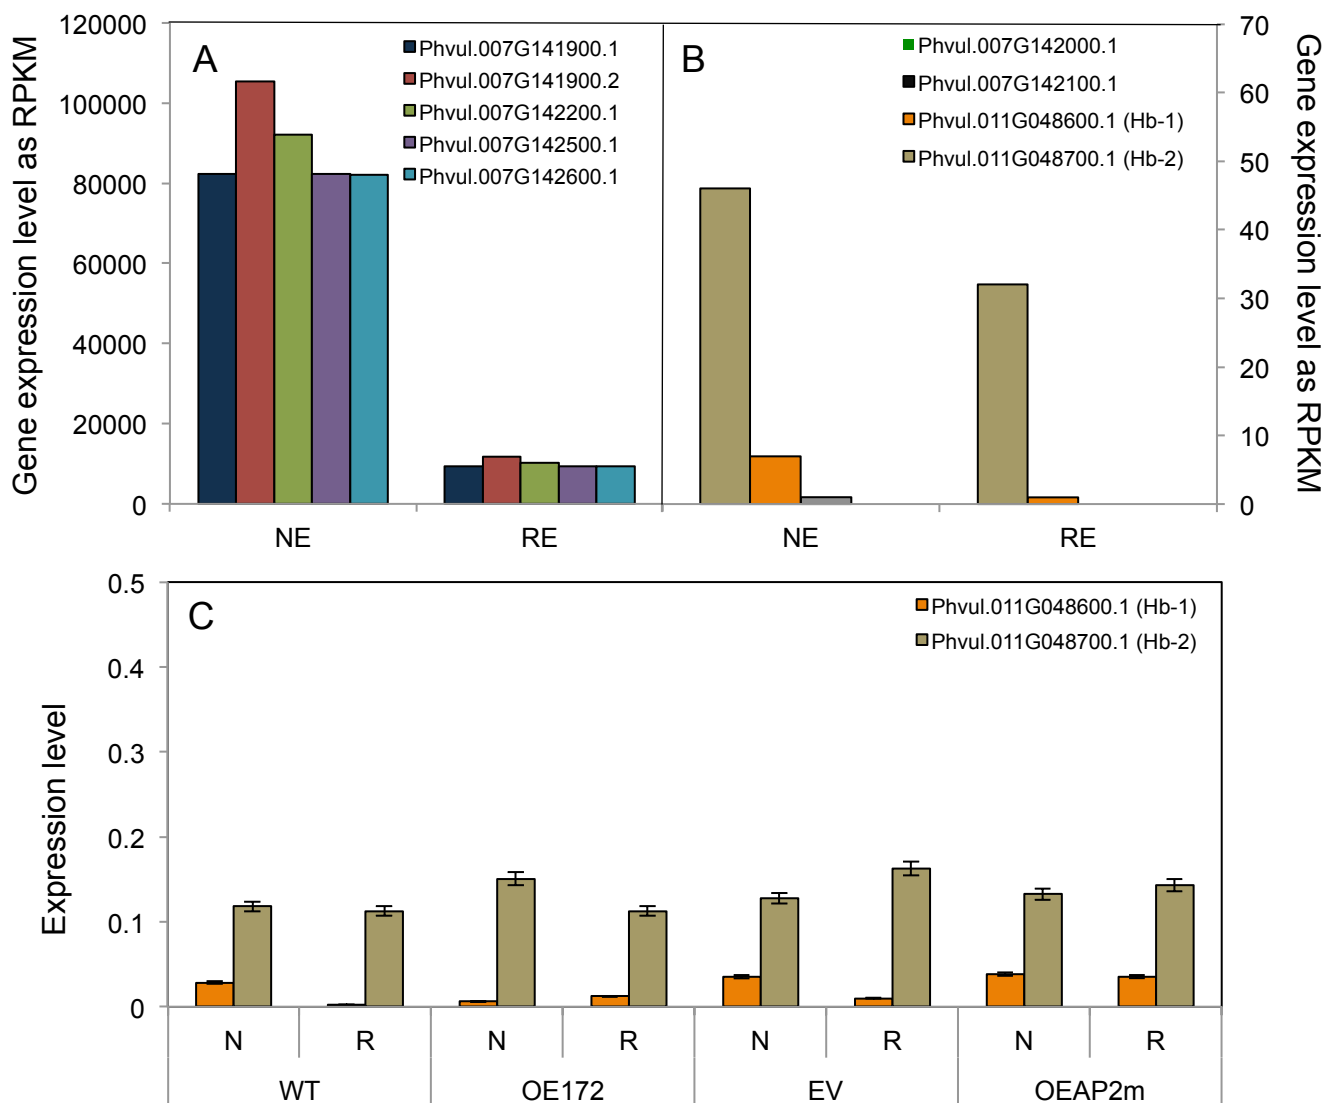

**Supplemental Figure S7. Expression analysis of *P. vulgaris* symbiotic (*Lb*) and non-symbiotic (*Hb*) hemoglobin genes.** *Lb* (A) and *Hb* (B) gene expression levels as RPKM from Pv GEA data. NE: effective (21 days post inoculation, dpi) nodules, RE: effective nodule-detached roots (21 dpi) (O'Rourke et al., 2014). C, Expression of Phvul011G048600 and Phvul011G048700 *Hb* genes was determined by qRT-PCR in mature nodules (N) and nodule-detached roots (R) and in of *R. etli*-inoculated wild type and composite OE172, EV or OEAP2m plants. Values represent the average ( $\pm$  SD) from three replicate samples per time point.
