# Supplementary material
Source: PubMed Central journal article supplement (PMC4424015)
Supplement: supp_pp.114.255547_255547Supplemental_Tabla_S3.pdf [file supp_pp.114.255547_255547Supplemental_Tabla_S3.pdf]

**Supplemental Table S3. Nitrogenase activity and expression analysis of marker genes for nodule development.**

Nitrogenase (Nase) activity assayed by ARA, and transcript level for each marker gene assayed by qRT-PCR, were determined in nodules harvested at different dpi from inoculated common bean plants grown under different treatments, as indicated. The selected marker genes are: PvENOD55: Early nodulin 55 (Phvul.003G155600) for early (immature) nodules, PvPEPc: Phosphoenolpyruvate carboxylase (Phvul.005G066400) for mature nodules and PvCP: Cystein proteinase (Phvul.003G240800) for late (senescent) nodules. Values are expressed relative to the highest Nase activity or expression value for each gene (100%) in effective nodules, these represent the average ( $\pm$ SD) from three biological replicates and two technical replicates each.

| Samples                                                                  | Nase Activity (%) | Relative expression (%) |            |            |
|--------------------------------------------------------------------------|-------------------|-------------------------|------------|------------|
|                                                                          |                   | ENOD55                  | PEPc       | CP         |
| <b>Effective nodules elicited by <i>R. etli</i> CE3 wt strain</b>        |                   |                         |            |            |
| 13dpi                                                                    | 19.6              | <b>100</b>              | 3.6        | 0.03       |
| 18dpi                                                                    | <b>100</b>        | 5.6                     | <b>100</b> | 0.04       |
| 25dpi                                                                    | 49.0              | 3.9                     | 25.1       | 9.7        |
| 35dpi                                                                    | 11.2              | 1.9                     | 3.8        | <b>100</b> |
| <b>Ineffective nodules elicited by <i>R.etli nifA</i>- mutant strain</b> |                   |                         |            |            |
| 13dpi                                                                    | 0.0               | 177.5                   | 3.4        | 0.27       |
| 18dpi                                                                    | 0.0               | 100.8                   | 2.5        | 43.3       |
| 25dpi                                                                    | 0.0               | 56.7                    | 1.7        | 148.7      |
| 35dpi                                                                    | 0.0               | 16.2                    | 1.3        | 71.5       |
| <b>NO<sub>3</sub> treated effective nodules</b>                          |                   |                         |            |            |
| 18dpi –NO <sub>3</sub> (Control)                                         | <b>100</b>        | 5.6                     | <b>100</b> | 0.04       |
| 19dpi + NO <sub>3</sub> (1 day post treatment)                           | 28.5              | 0.36                    | 67.8       | 11.1       |
| 21dpi + NO <sub>3</sub> (3 day post treatment)                           | 11.7              | 0.56                    | 0.58       | 58.8       |
