# Supplementary material
Source: PubMed Central journal article supplement (PMC4424015)
Supplement: supp_pp.114.255547_255547Supplemental_Tabla_S4.pdf [file supp_pp.114.255547_255547Supplemental_Tabla_S4.pdf]

**Supplemental Table S4.** *Expression analysis of marker genes for nodule development in transgenic nodules of OE172, EV or OEAP2m plants.*

The expression of the marker genes indicated in Supplemental Table S1 was determined. ND: Not determined. Values are expressed relative to the highest expression value for ENOD55 or PEPc (100%) in effective nodules of EV plants; these represent the average ( $\pm$  SD) from three biological replicates and two technical replicates each.

| Samples                                          | Expression level |            |        |       |            |        |       |     |        |
|--------------------------------------------------|------------------|------------|--------|-------|------------|--------|-------|-----|--------|
|                                                  | ENOD55           |            |        | PEPc  |            |        | CP    |     |        |
| Transgenic effective nodules (-N)                | OE172            | EV         | OEAP2m | OE172 | EV         | OEAP2m | OE172 | EV  | OEAP2m |
| 10dpi                                            | 63               | <b>100</b> | 276    | 143   | 17         | 13     | ND    | ND  | ND     |
| 14dpi                                            | 47               | 92         | 211    | 229   | 68         | 32     | ND    | ND  | ND     |
| 21dpi                                            | 37               | 41         | 156    | 339   | <b>100</b> | 52     | 2     | 10  | 48     |
| 30dpi                                            | ND               | ND         | ND     | ND    | ND         | ND     | 32    | 100 | 116    |
| <b>NO<sub>3</sub> treated transgenic nodules</b> |                  |            |        |       |            |        |       |     |        |
| <b>1mM</b>                                       |                  |            |        |       |            |        |       |     |        |
| 14dpi                                            | 165              | 0          | 0      | 96    | 0          | 0      |       |     |        |
| 21dpi                                            | 93               | 261        | 0      | 468   | 62         | 0      |       |     |        |
