# Supplementary material
Source: PubMed Central journal article supplement (PMC4424015)
Supplement: supp_pp.114.255547_255547Supplemental_Table_S1.pdf [file supp_pp.114.255547_255547Supplemental_Table_S1.pdf]

**Supplemental Table S1. Primer sequences for qRT-PCR**

| <b>Gene Name</b>                     | <b>Gene ID</b>   | <b>Forward Primer (5' - 3')</b> | <b>Reverse Primer (3' - 5')</b> |
|--------------------------------------|------------------|---------------------------------|---------------------------------|
| miR172a                              | Chr. 1           | AGAATCTTGATGATGCTGCA            |                                 |
| miR172b                              | Chr. 5           | AGAATCTTGATGATGCTGCAT           |                                 |
| miR172c                              | Phvul.001G233200 | GGAATCTTGATGATGCTGCAG           |                                 |
| miR156a                              | Chr. 9           | TGACAGAAGAGAGTGAGCAC            |                                 |
| miR159                               | Chr. 4           | TTTGGATTGAAGGGAGCTCTA           |                                 |
| UBC9                                 | Phvul.006G110100 | GCTCTCCATTTGCTCCCTGTT           | TGAGCAATTTTCAGGCACCAA           |
| AP2-1                                | Phvul.005G138300 | CAGCTACCTTTCCGCCAAATGC          | TAGGCTGGGATGGTGTCTGCAG          |
| AP2                                  | Phvul.011G071100 | CGGAAAATTCACCTGGCGTC            | TCCGATCGAAAGCAACCGAA            |
| AP2                                  | Phvul.001G174400 | ATCGCGGCGTCACTTTCTAT            | GCAGCTCGATCATAAGCCCT            |
| AP2                                  | Phvul.003G241900 | AAAGCACTGGATTCCCGAGG            | TGCAGCTTCAATCTCGGTGT            |
| AP2                                  | Phvul.002G016900 | AACGGAGGCCGTATTGGAAG            | GCCAACCTAGGGAGGGTCTA            |
| AP2                                  | Phvul.007G240200 | ACTGAAGGCAACAAGGAGCA            | CTCCCACAACCCCGATTTGA            |
| SPL                                  | Phvul.009G165100 | TGCAGATGCTAGGTTGCACA            | GTGGAGGGATGGTTACCGTG            |
| NOD55                                | Phvul.003G155600 | AATAACCAGTGGCCAACATCA           | AGTGCTTCCTAAACGCAAACA           |
| NF-YA1 (HAP2)                        | Phvul.001G196800 | TACTTTGGCAATCCATCCTTG           | AGACAGTTCGGTGCAGAAAGA           |
| NSP2                                 | Phvul.009G122700 | GACGGTTATCGGGTAGAGGAG           | CGGAGGAAGAAGAAGTCCAAA           |
| CYCLOPS                              | Phvul.002G128600 | TCCTTACCACATTCTGCTGAGA          | CCAAGAGATTCCAGAGGTTCA           |
| NIN                                  | Phvul.009G115800 | GGGAGAAGAGGCGTACGAAG            | GTTGTGGGACACACTCCGAT            |
| ENOD40                               | Phvul.002G064200 | GGGTCCTTACCCTCACACT             | TGTAGCCAAAGCCTCTCATCC           |
| FLOT2                                | Phvul.009G090700 | GGAACCCTGTCAGACAAAACA           | TTCACGAATCCAAAACAACC            |
| PEPC                                 | Phvul.005G066400 | AAGTGAGTATGCCCTGGTTT            | GAAAGGGAAGATGGGTGAAAG           |
| Cystein-Proteinase CP                | Phvul.003G240800 | CCTCTGGCAGGGCTTTGCAACT          | GGTGCTTCTCACGTTGCGCT            |
| Aminocyclopropanecarboxylate oxidase | Phvul.002G326600 | GGAGCACCGTGTGATTGCTA            | CCAACAATGGTGGTGCAGGA            |
| Serine/threonine protein kinase      | Phvul.007G049500 | GCGGTCTCCTTCACGCTTAT            | GCTGTTGGCTGTGTAGTTGC            |
| Serine/threonine protein kinase      | Phvul.007G049000 | CTGGTGGAACACAGCAAAGG            | GCAGCATACTTACGACGGGA            |
| Glycogen synthase kinase-3           | Phvul.006G174500 | ATACTCCCAAGTCTCCGGT             | CATTTGGCAGGCGAGCATTG            |
| Serine/threonine protein kinase      | Phvul.011G169600 | AGCCTTGCGCAAACCATTTT            | CACGTGCAATCCCAATGCAA            |
| Serine/threonine protein kinase      | Phvul.008G263900 | GGGGAGCGTCTAGACATAGC            | TGCCACTTTGGCCTTTAGGT            |
| Hb-1                                 | Phvul.011G048600 | TGTGGTCCCCGAAATGAAG             | GCACAGACCCAAACACAACC            |
| Hb-2                                 | Phvul.011G048700 | ATTCTGCAGAGTTGGGCCTC            | TGCTCCAAAGGAACGGTTGA            |
| RIC1                                 | Phvul.005G096900 | TATTGCGGACAGCCATCATCA           | TCCCTCTGGTGCAGTCTAT             |
| NIC1                                 | Phvul.005G097000 | AGAAGACCCAACTCGAAGGT            | TCCTCCGGGGCTTAGTCTTT            |
